# Supplementary material for: Novel Pyrazole-Hydrazone Derivatives Containing an Isoxazole Moiety: Design, Synthesis, and Antiviral Activity
Source: MDPI journal article supplement (doi:10.3390/molecules23071798), 2018-07-20
Supplement: s1 [file s1]

Article

# Novel Pyrazole-Hydrazone Derivatives Containing an Isoxazole Moiety: Design, Synthesis, and Antiviral Activity

Zaibo Yang <sup>1\*</sup>, Pei Li <sup>2</sup> and Xiuhai Gan <sup>3</sup>

<sup>1</sup> School of Chemistry and Chemical Engineering, Qiannan Normal University for Nationalities, Guizhou, Duyun 558000, China

<sup>2</sup> Qiandongnan Engineering and Technology Research Center for Comprehensive Utilization of National Medicine, Kaili University, Guizhou, Kaili 556011, China; pl19890627@126.com

<sup>3</sup> College of Chemistry and Life Science, Guizhou Normal College, Guiyang 550018, China; gxh200719@163.com

\* Correspondence: qnsyyzb27001@sgmtu.edu.cn; Tel.: 86-85-4873-7046

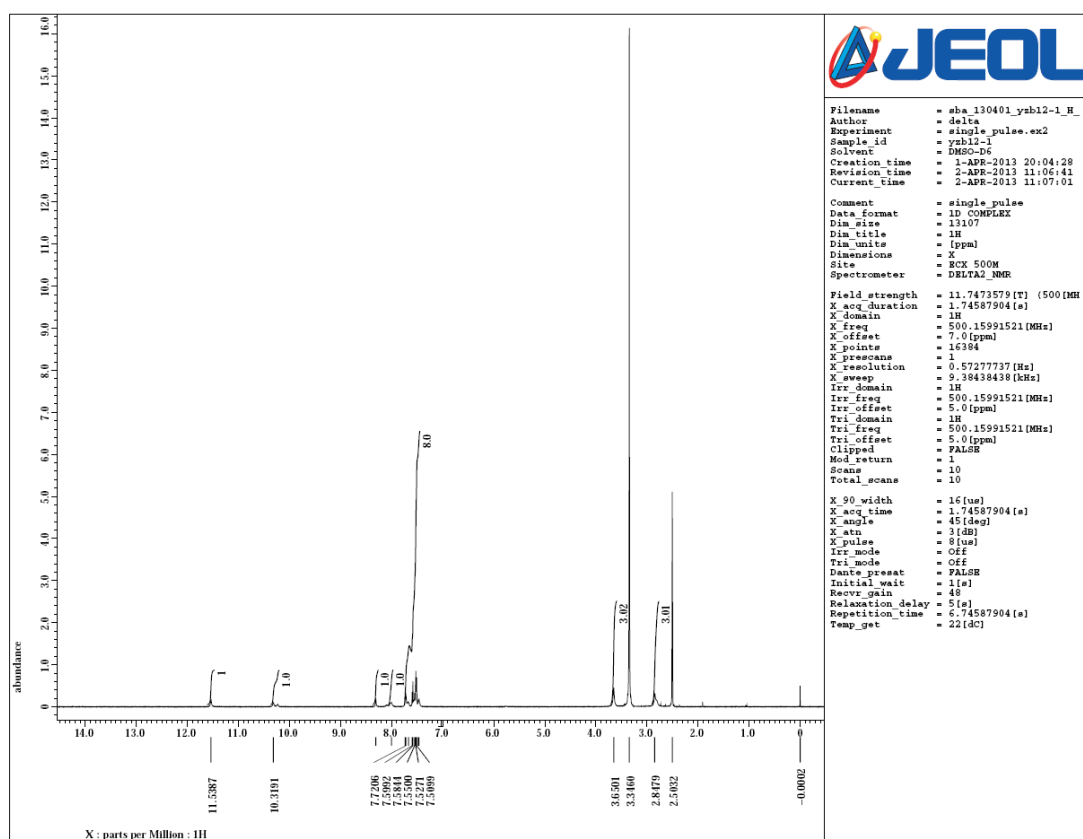

<sup>1</sup>H NMR for compound 6a.

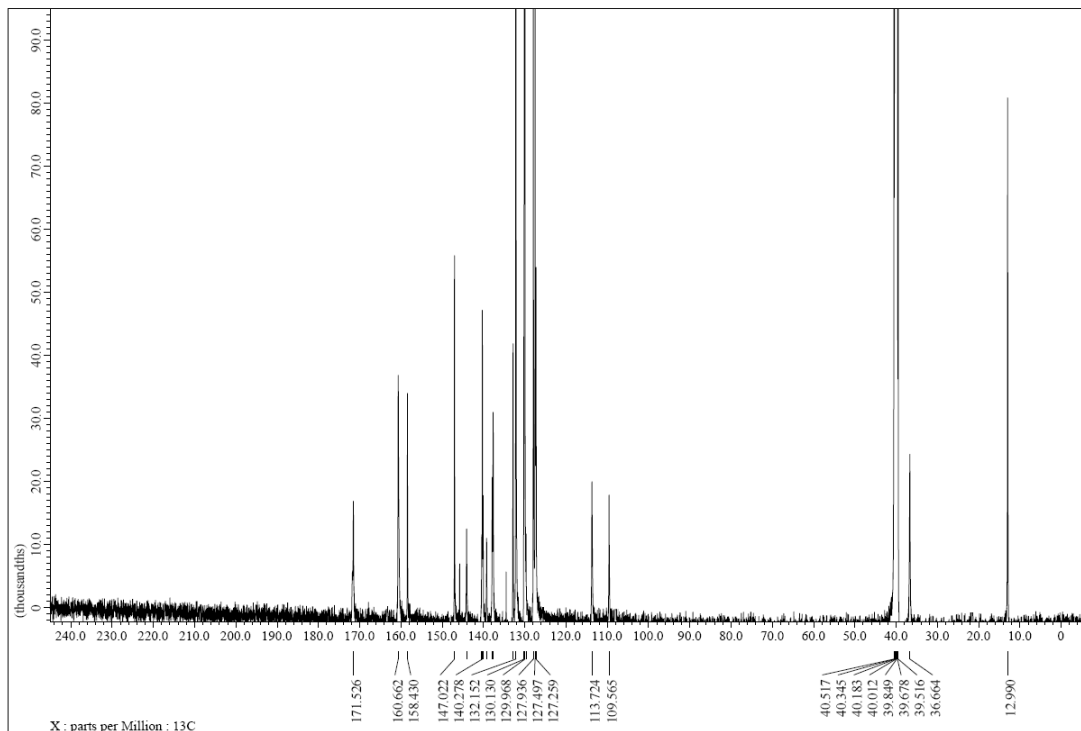

<sup>13</sup>C NMR for compound **6a**.

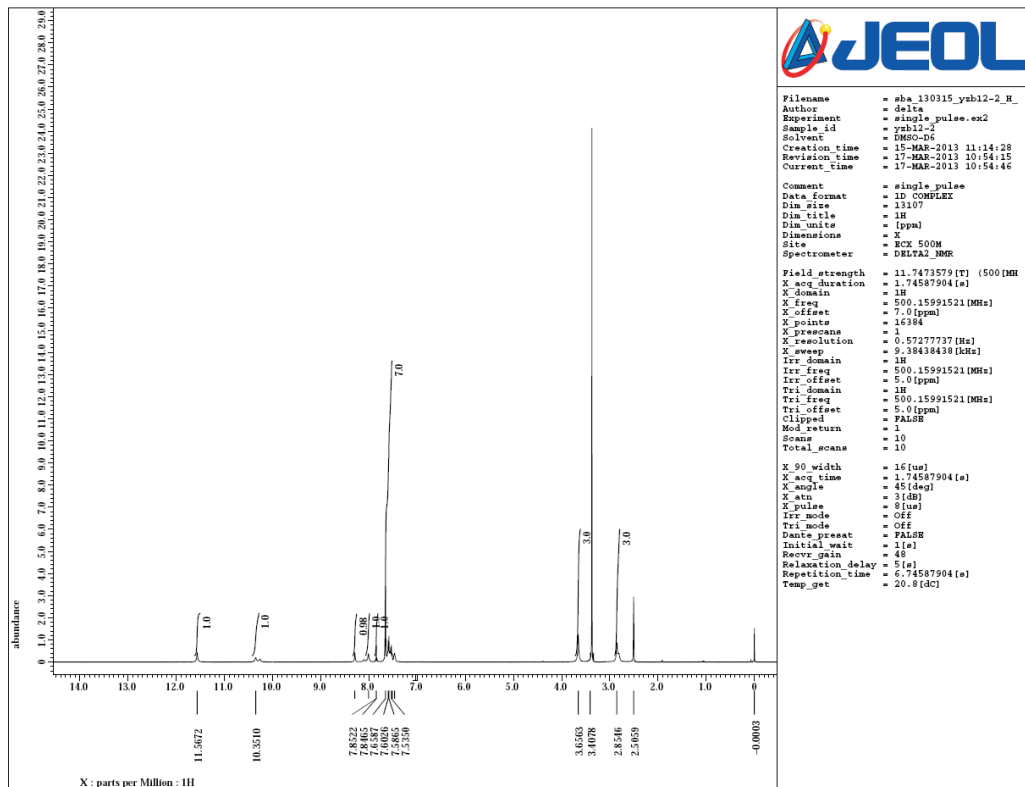

<sup>1</sup>H NMR for compound **6b**

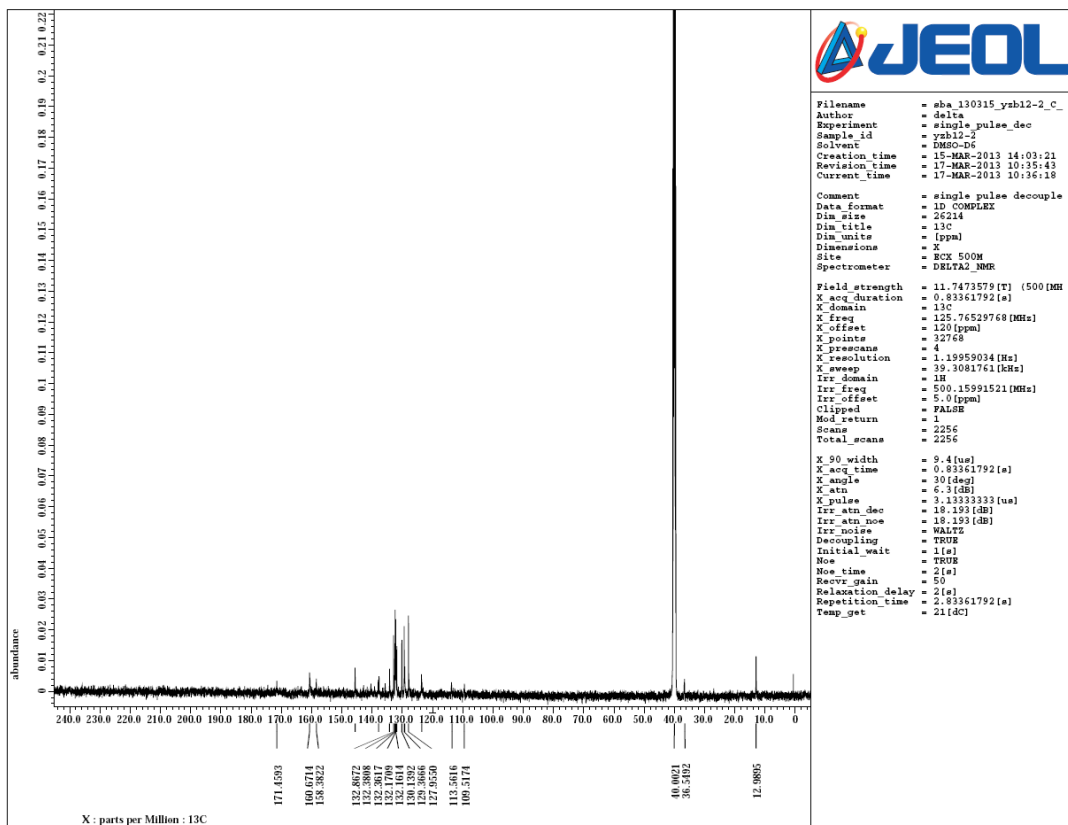

<sup>13</sup>C NMR for compound 6b

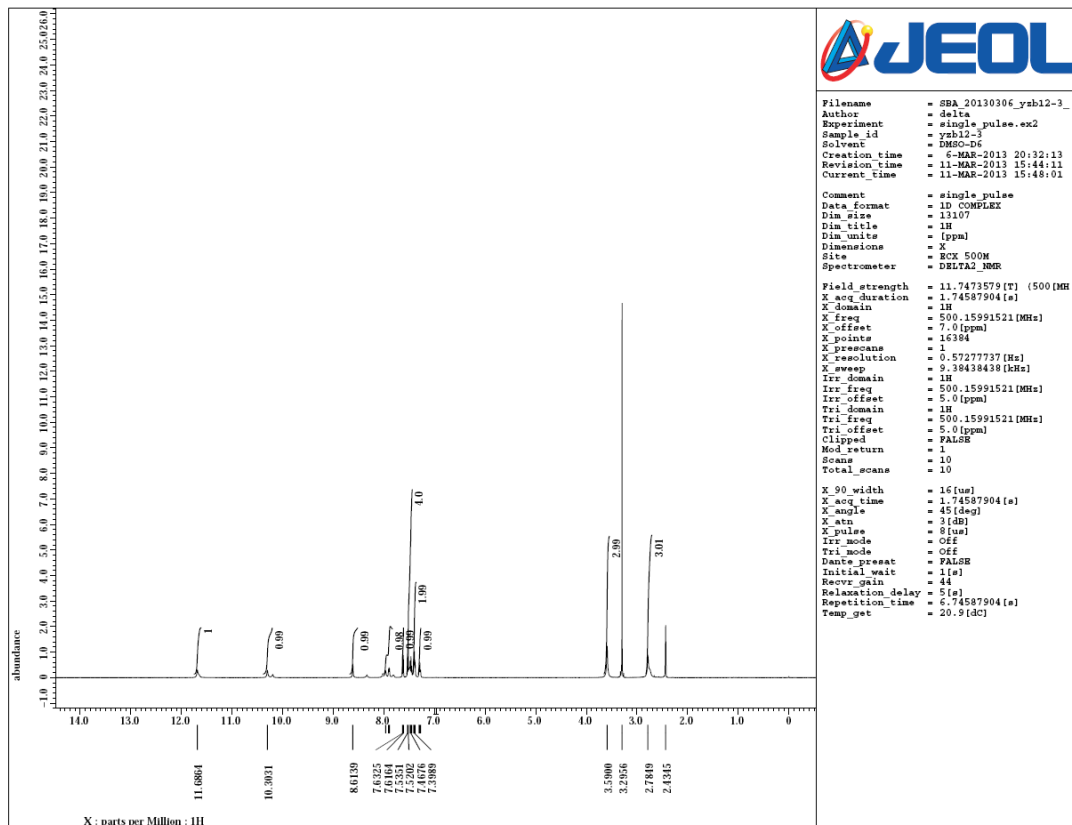

<sup>1</sup>H NMR for compound 6c

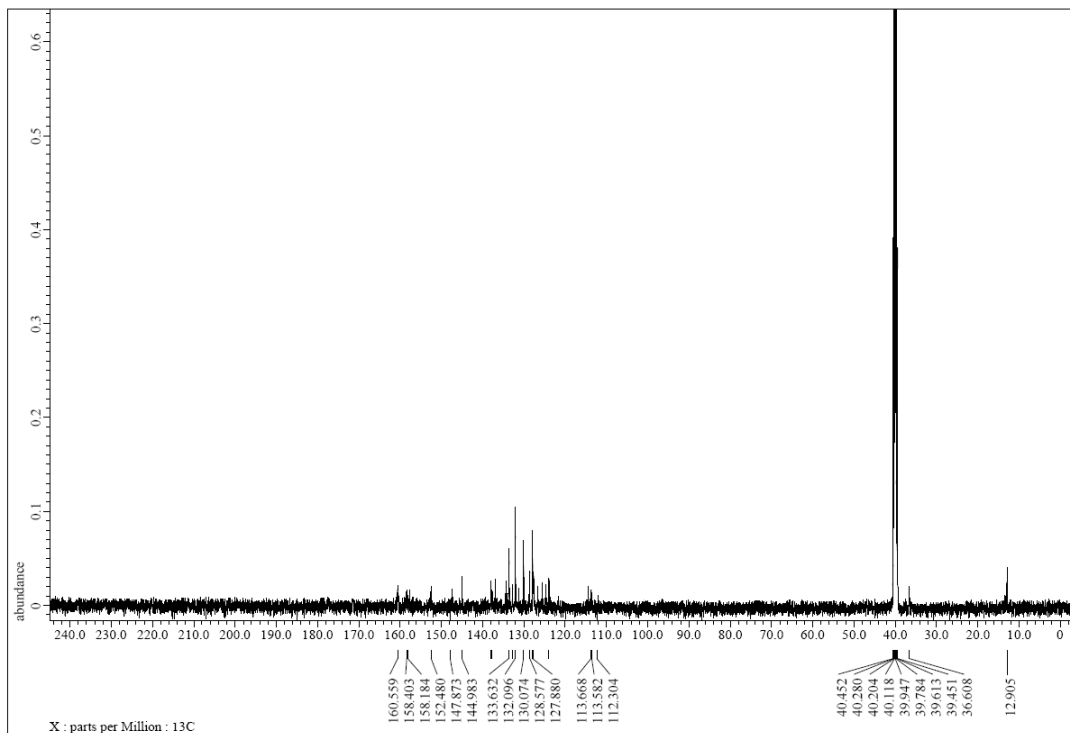

$^{13}\text{C}$  NMR for compound **6c**

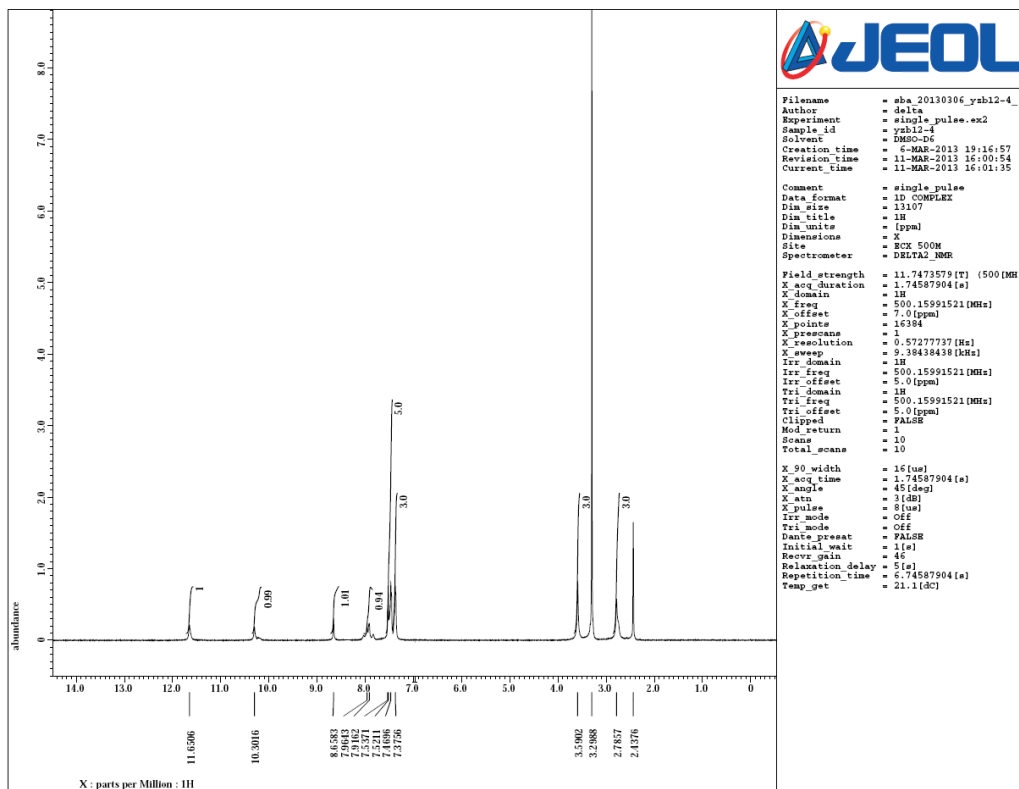

$^1\text{H}$  NMR for compound **6d**

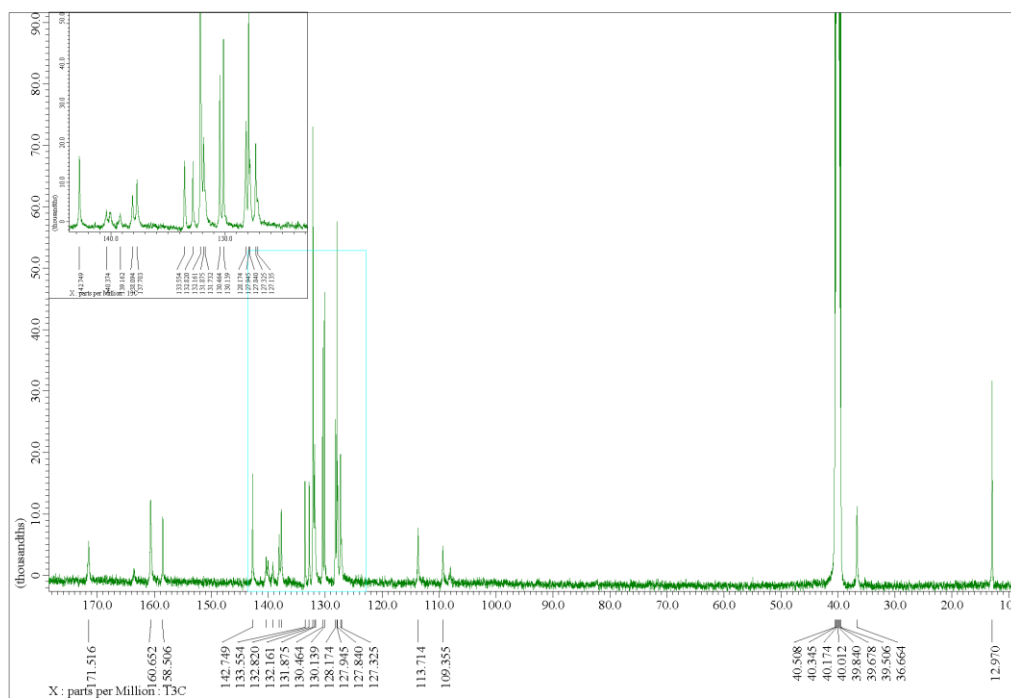

<sup>13</sup>C NMR for compound 6d

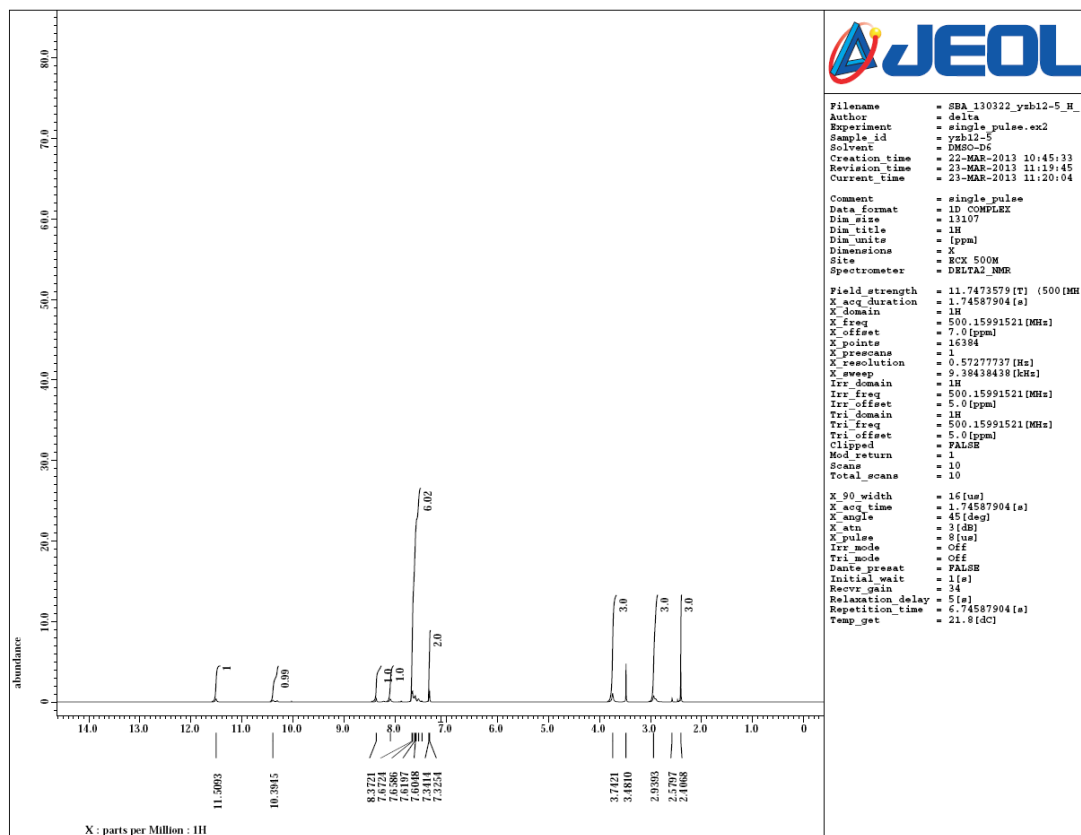

<sup>1</sup>H NMR for compound 6e

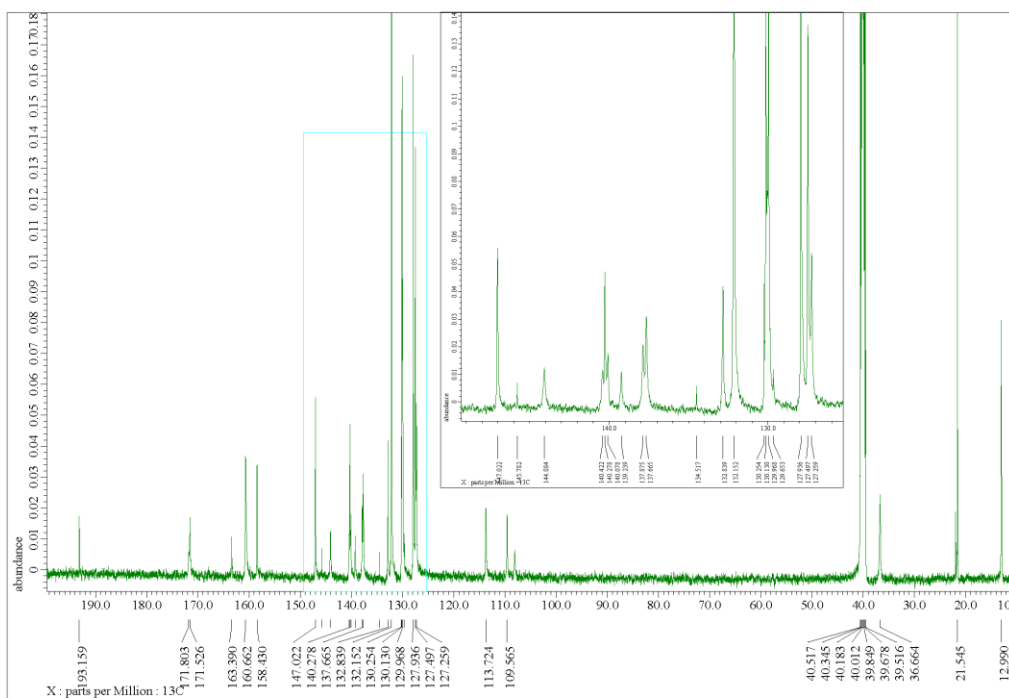

<sup>13</sup>C NMR for compound 6e

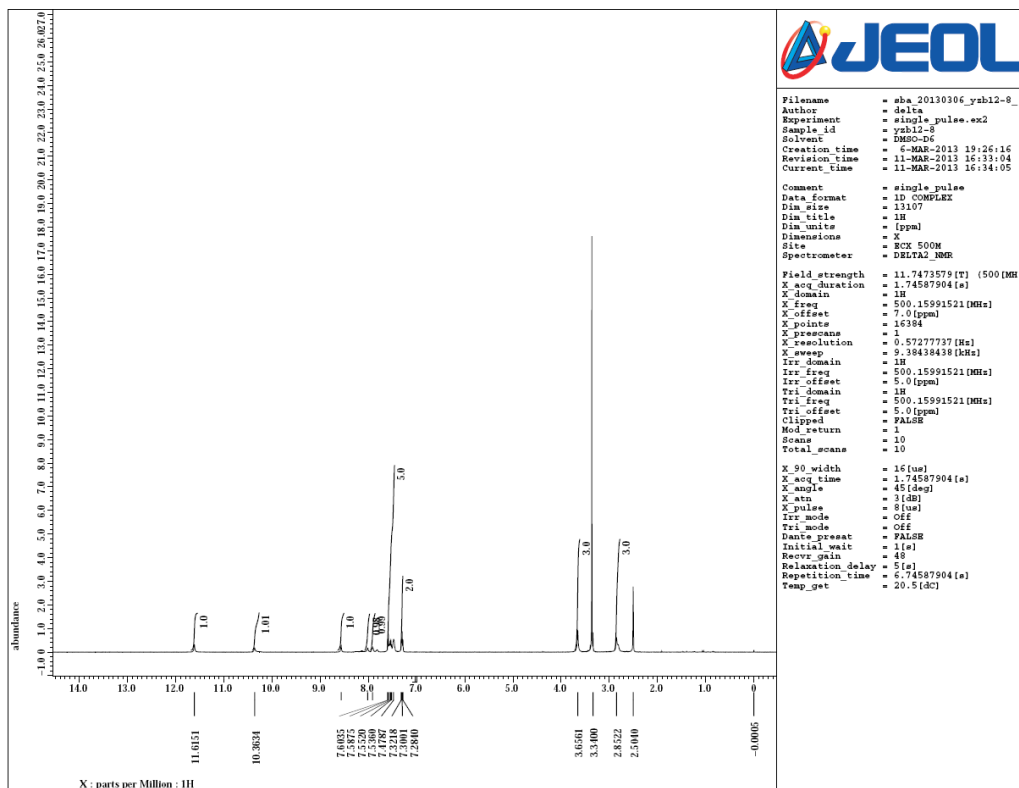

<sup>1</sup>H NMR for compound 6f

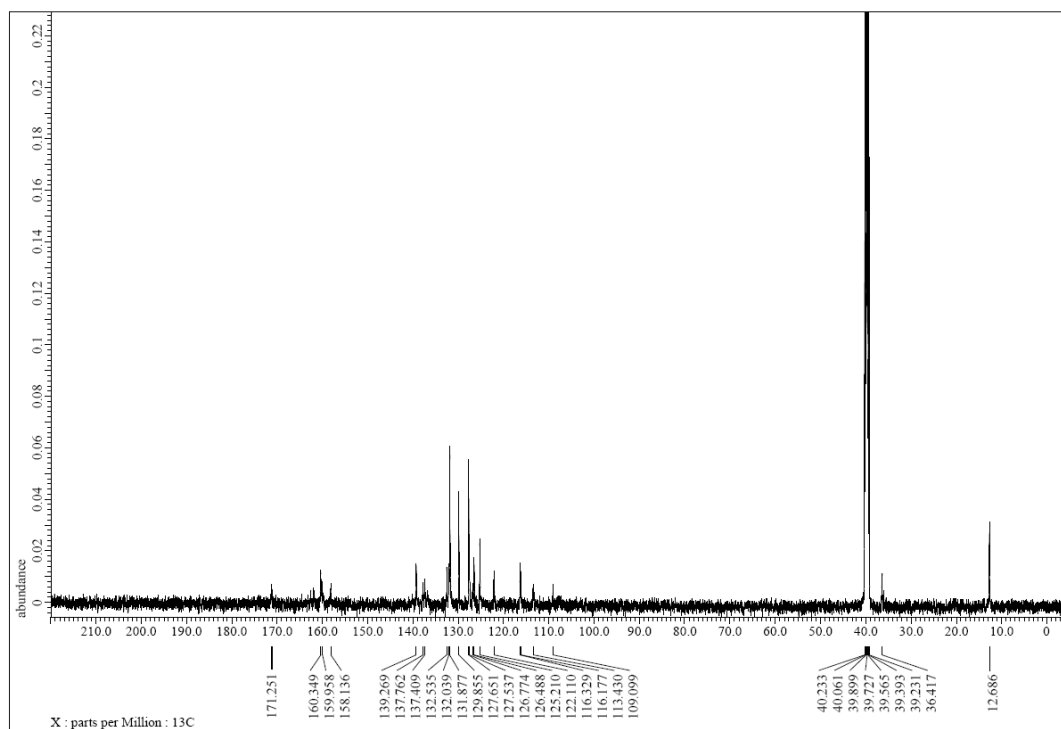

$^{13}\text{C}$  NMR for compound **6f**

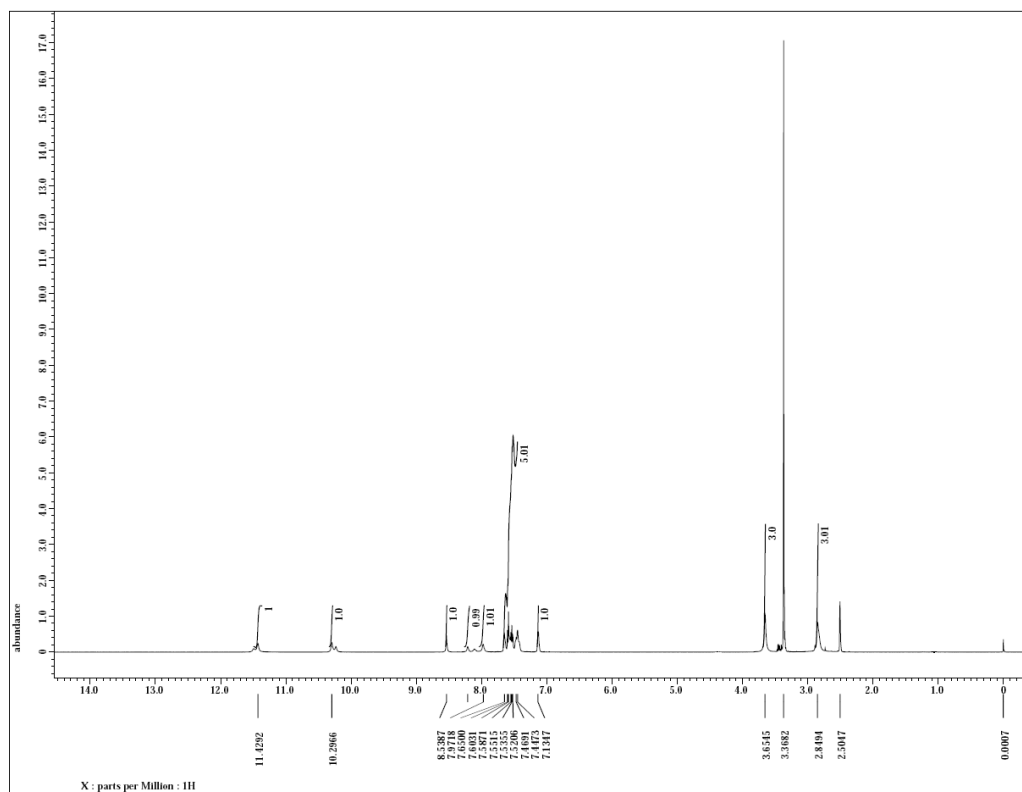

$^1\text{H}$  NMR for compound **6g**

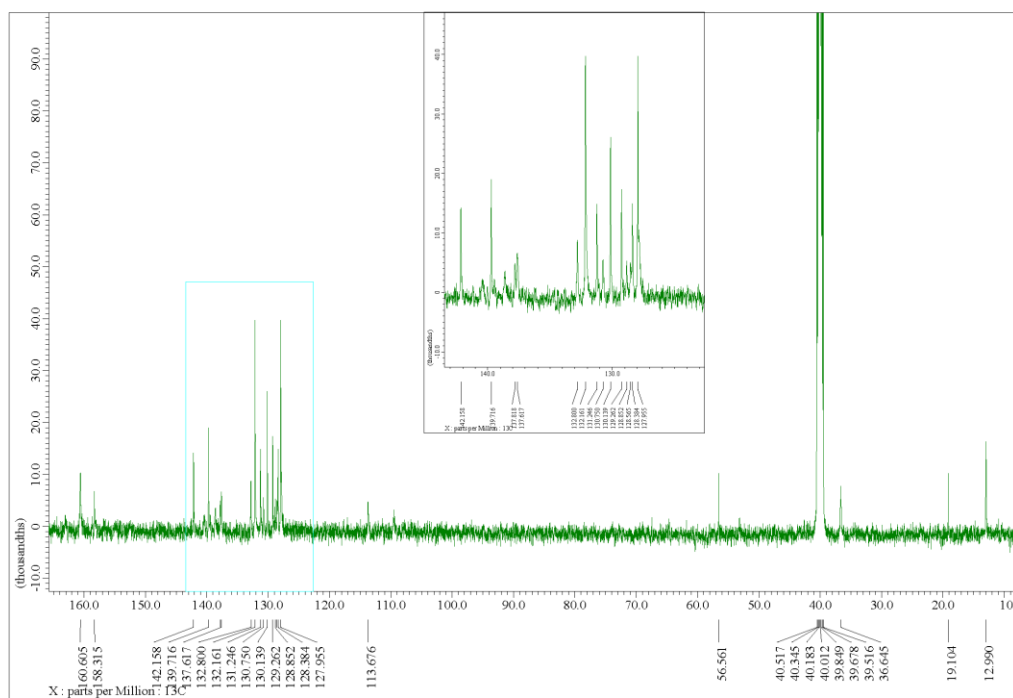

$^{13}\text{C}$  NMR for compound **6g**

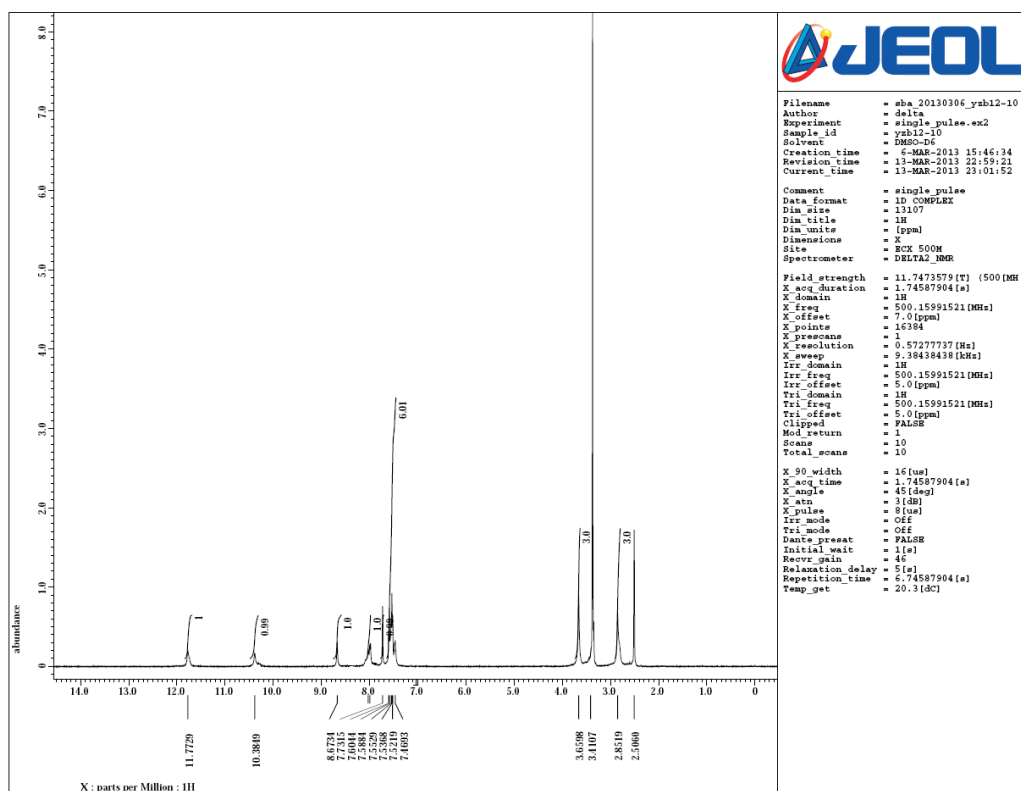

$^1\text{H}$  NMR for compound **6h**



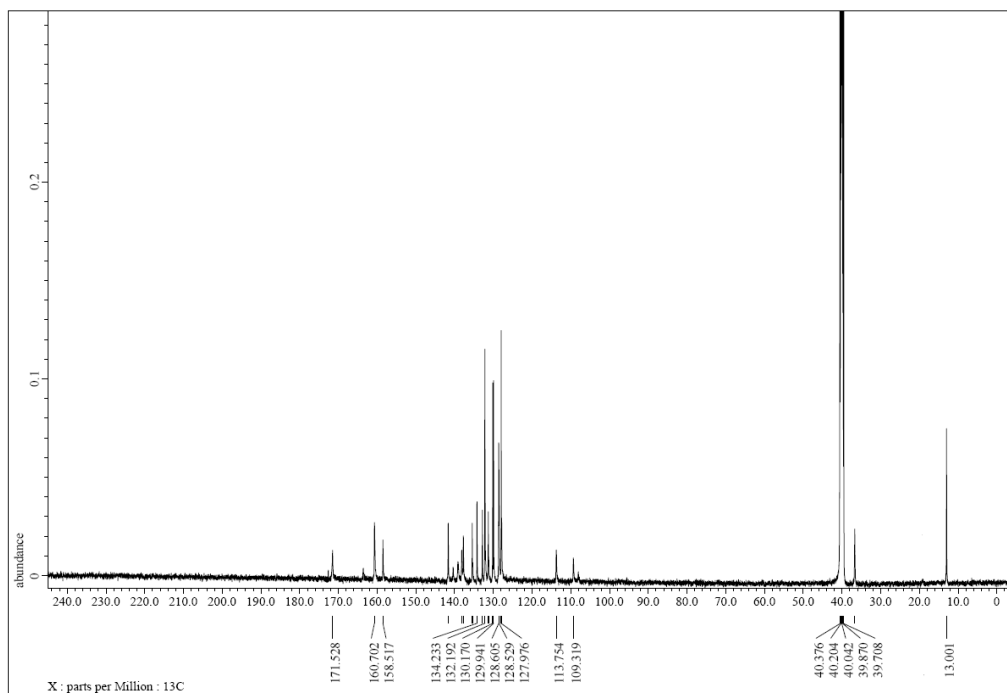

<sup>13</sup>C NMR for compound 6h

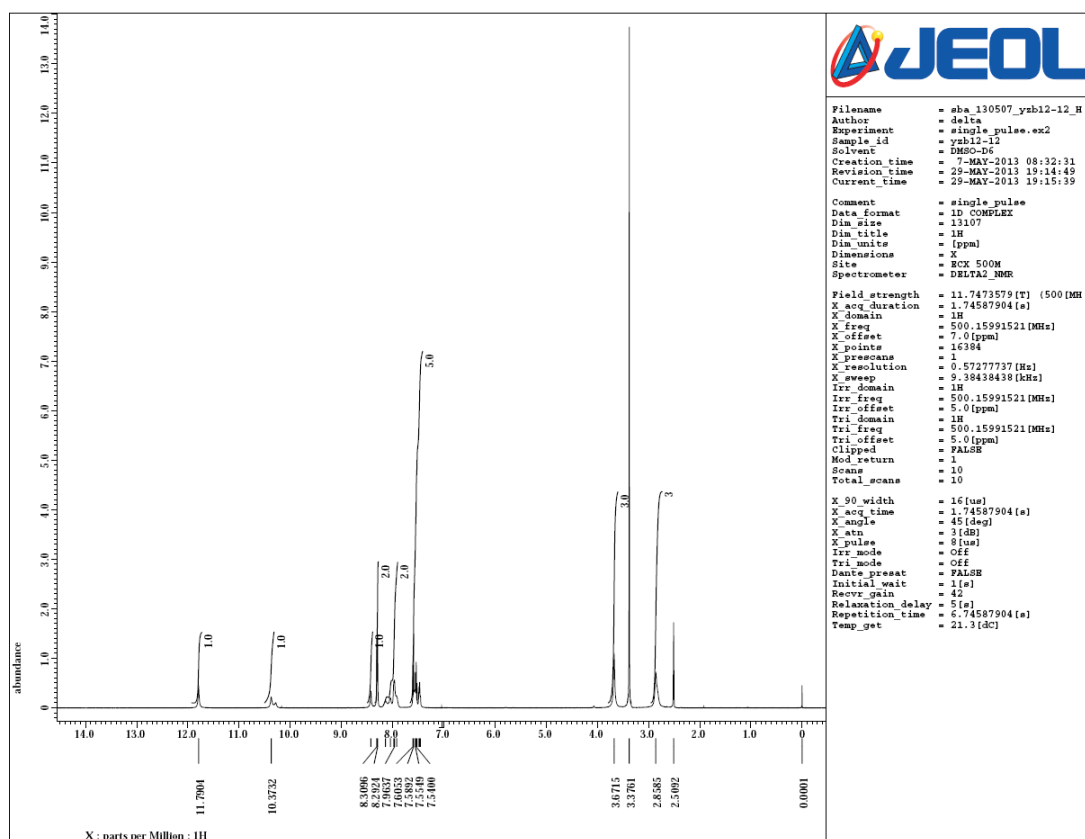

<sup>1</sup>H NMR for compound 6i

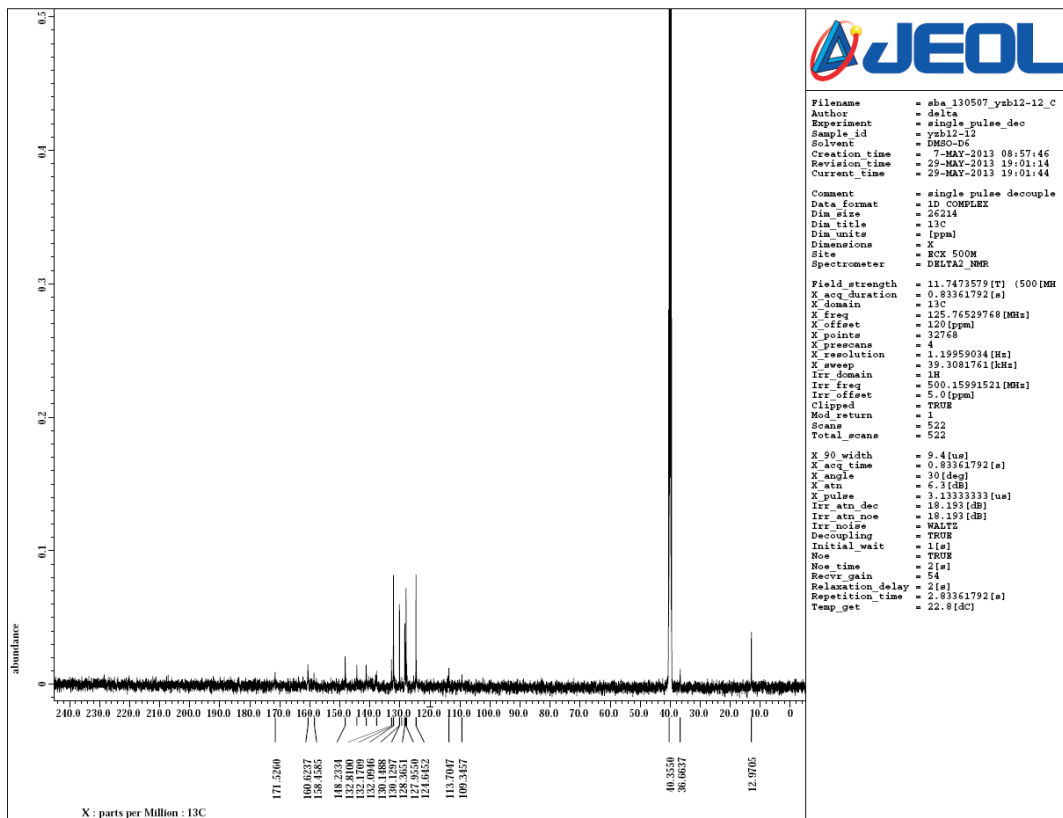

<sup>13</sup>C NMR for compound 6i

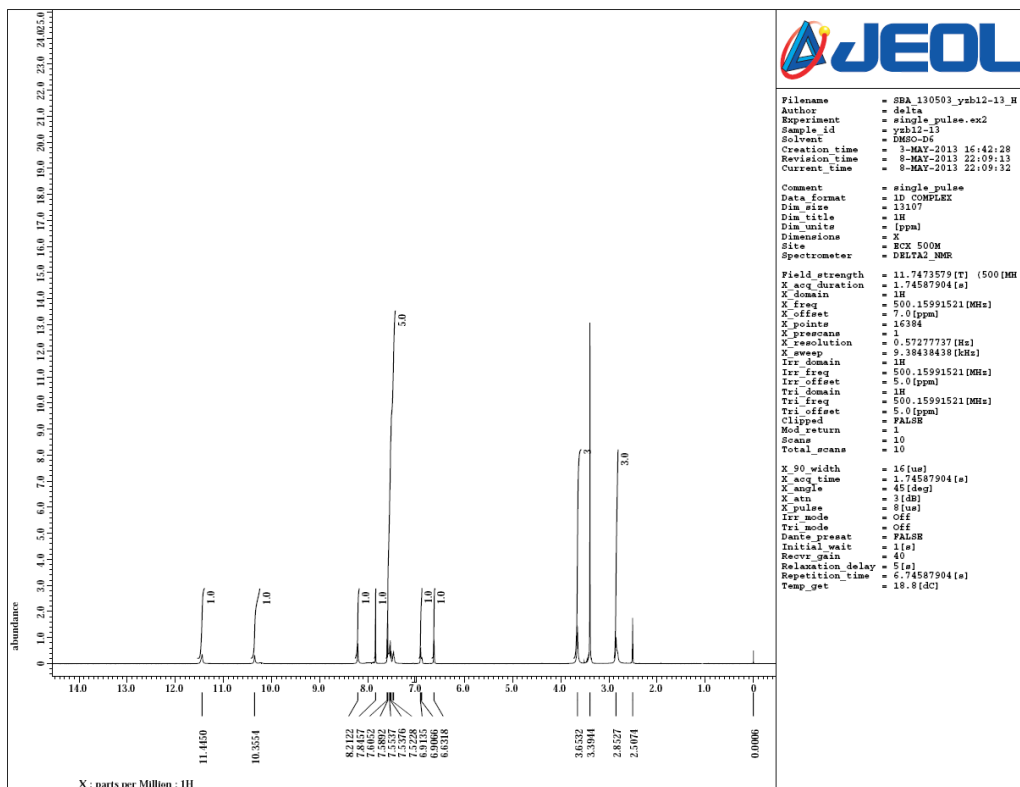

<sup>1</sup>H NMR for compound 6j

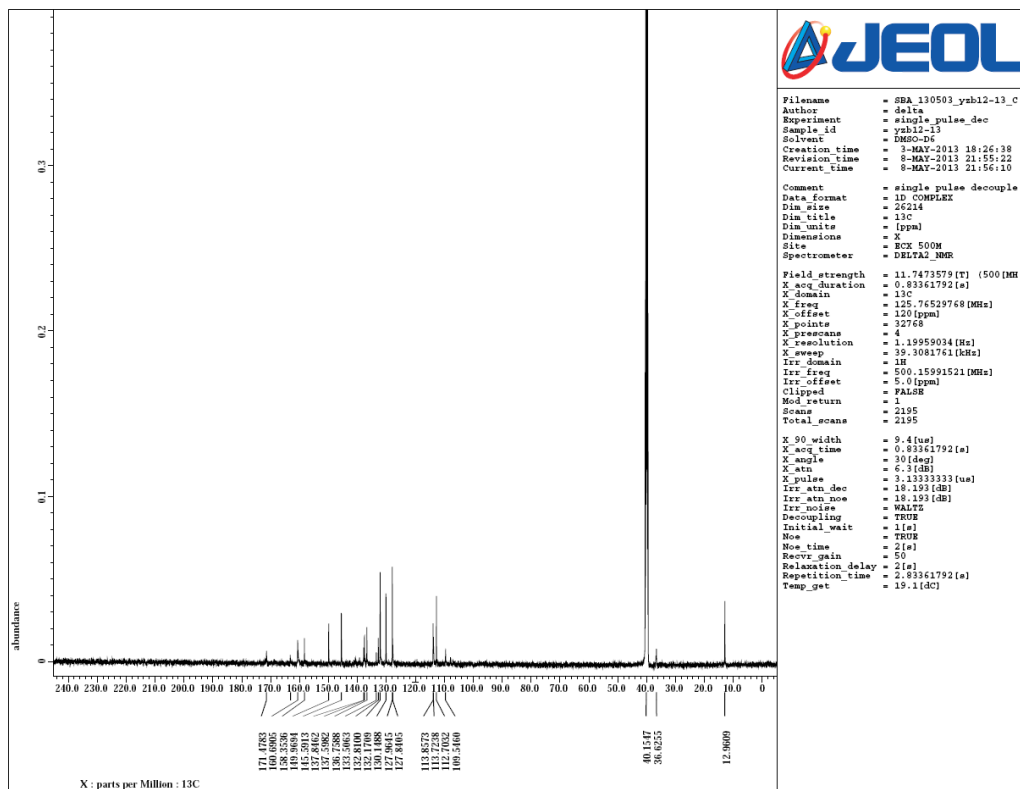

<sup>13</sup>C NMR for compound 6j

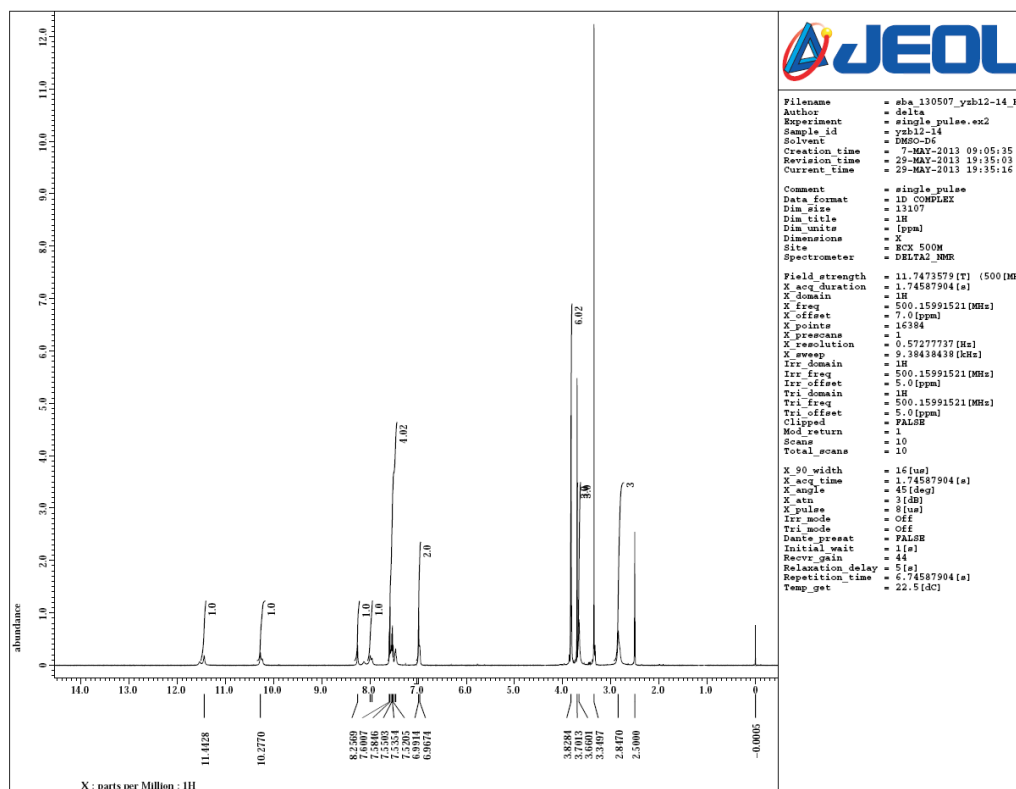

<sup>1</sup>H NMR for compound 6k

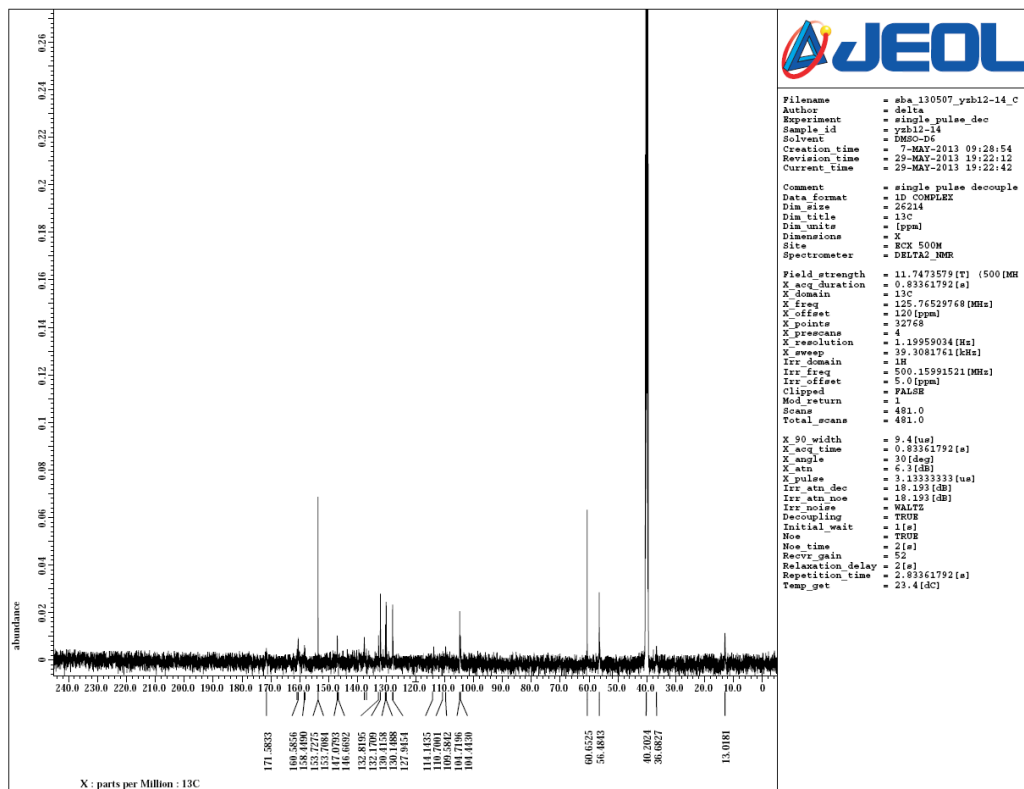

<sup>13</sup>C NMR for compound **6k**

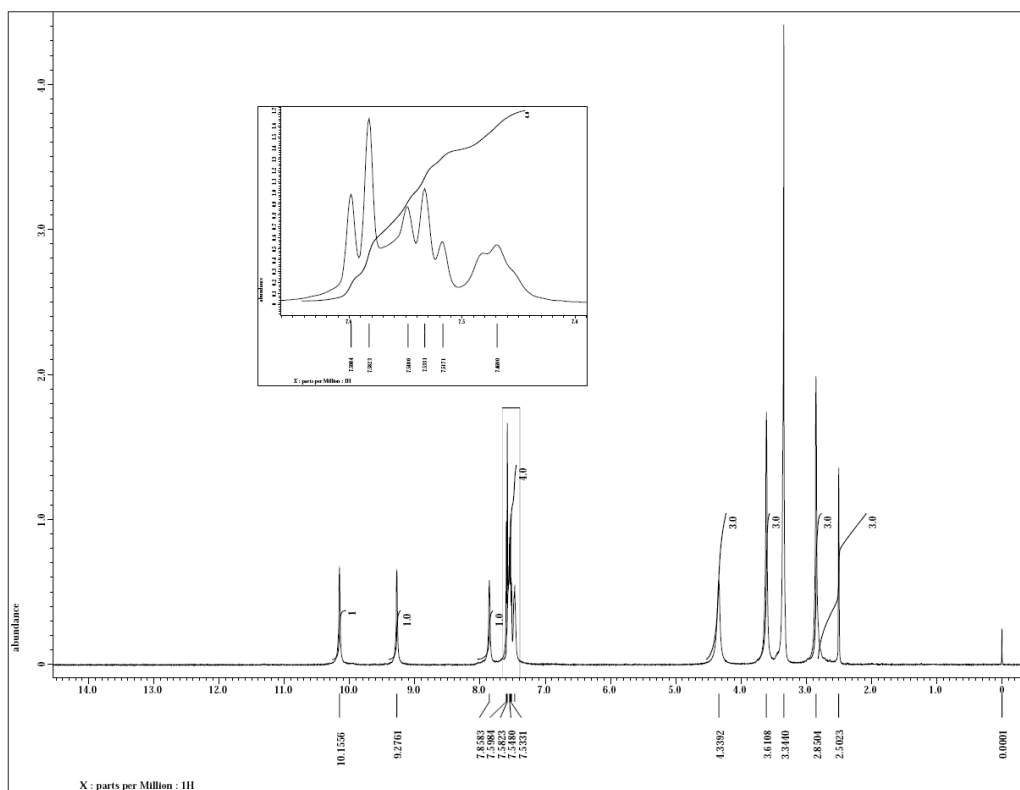

<sup>1</sup>H NMR for compound **6l**

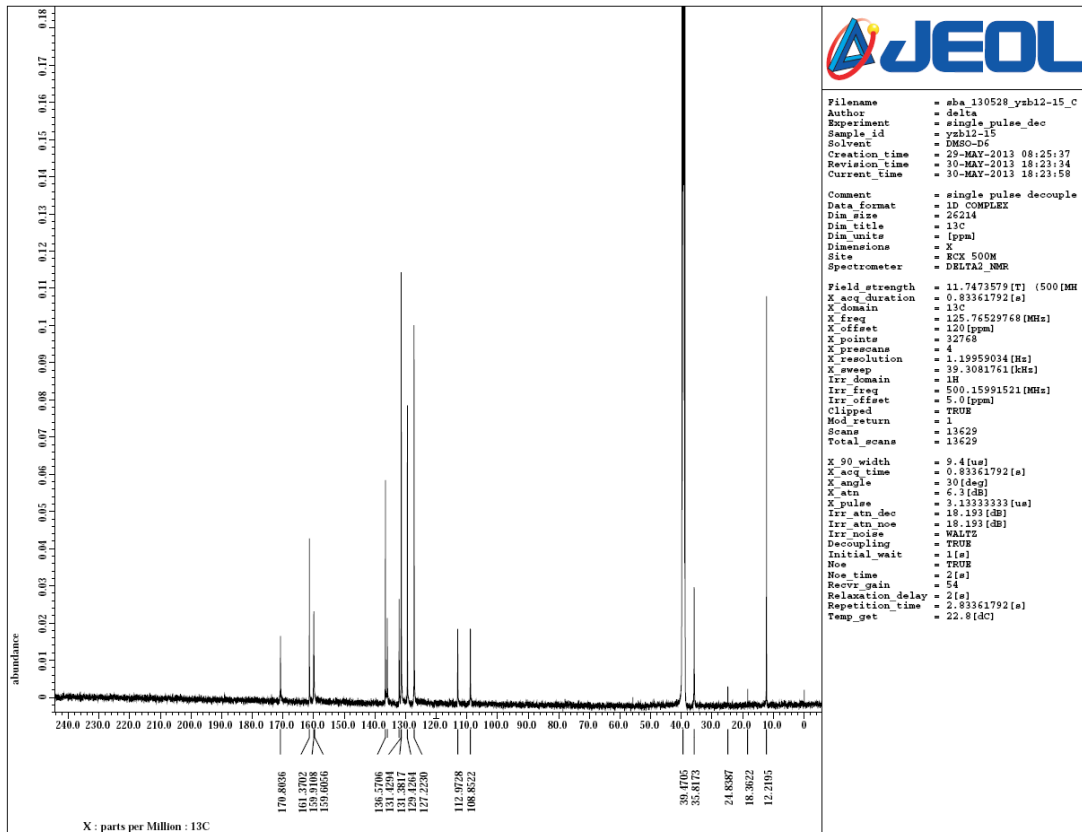

<sup>13</sup>C NMR for compound **6l**

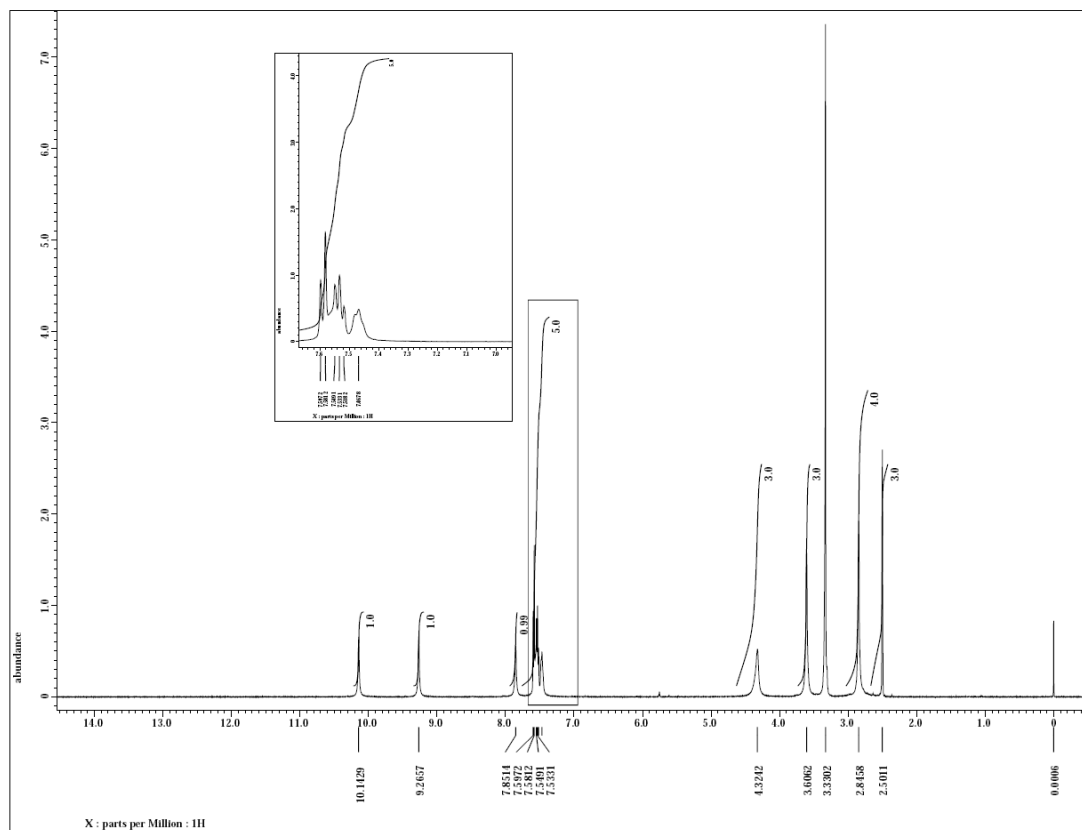

<sup>1</sup>H NMR for compound **6m**

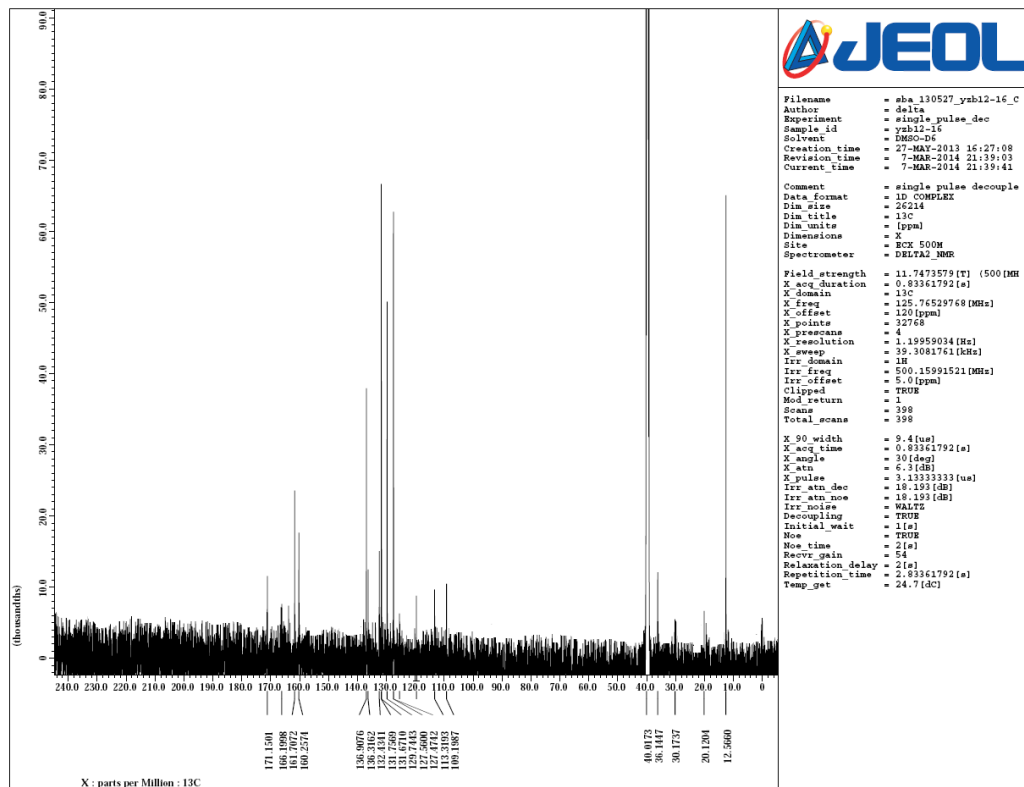

<sup>13</sup>C NMR for compound **6m**

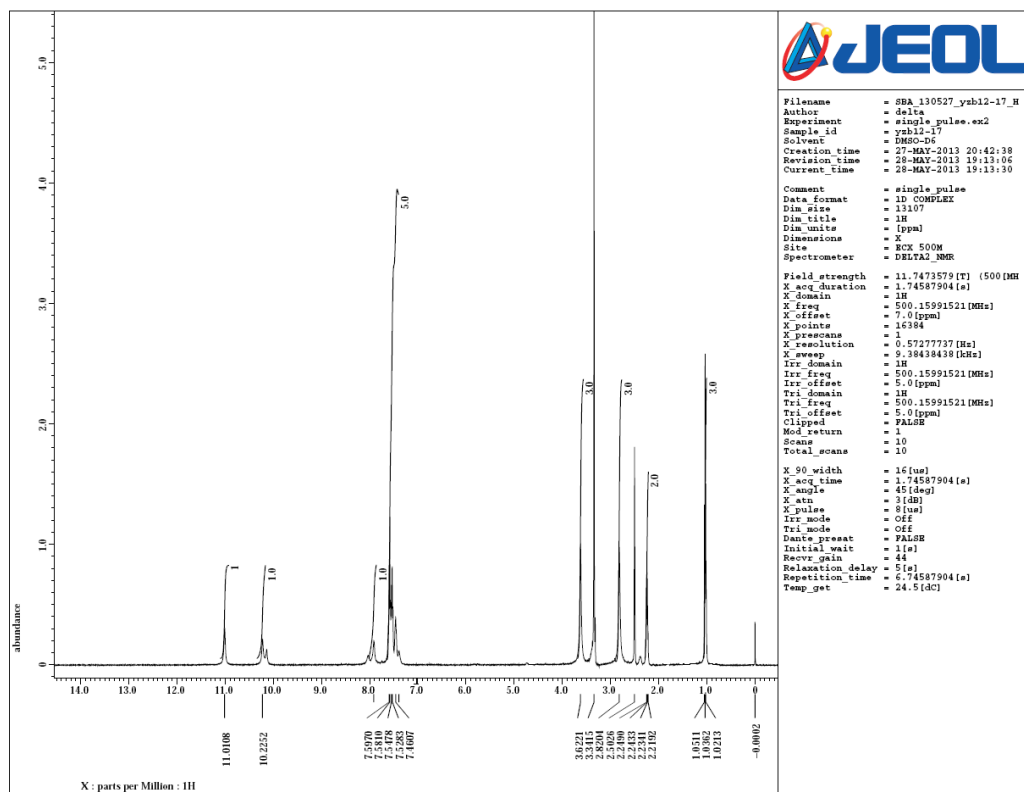

<sup>1</sup>H NMR for compound **6n**

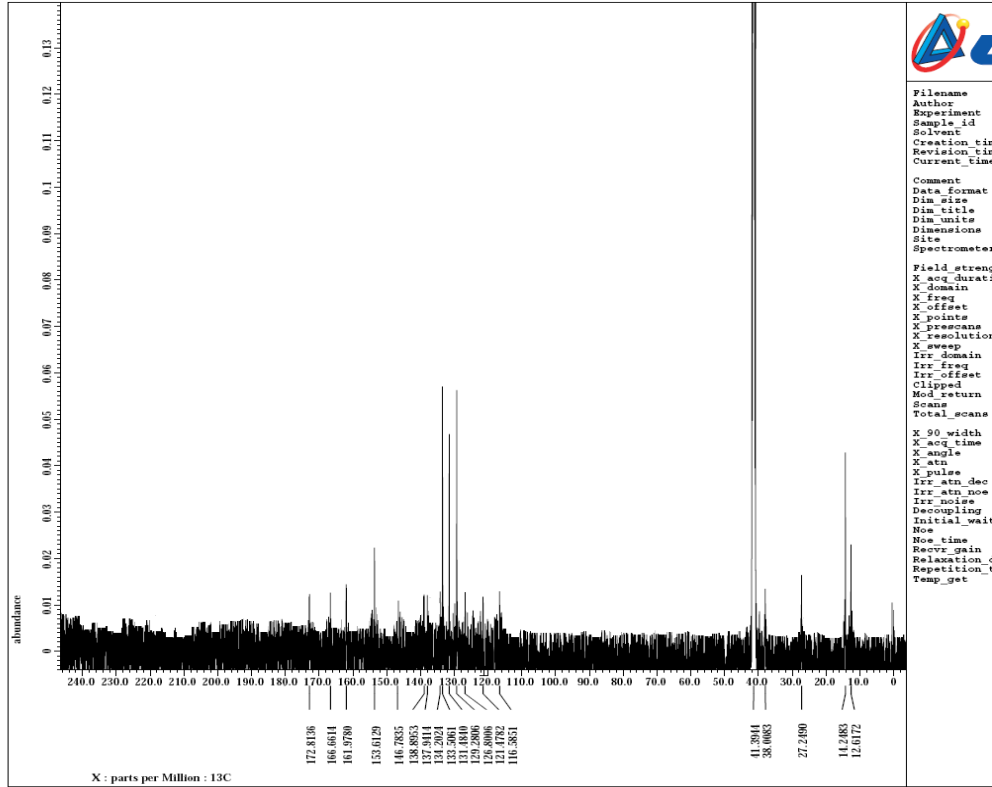

<sup>13</sup>C NMR for compound **6n**

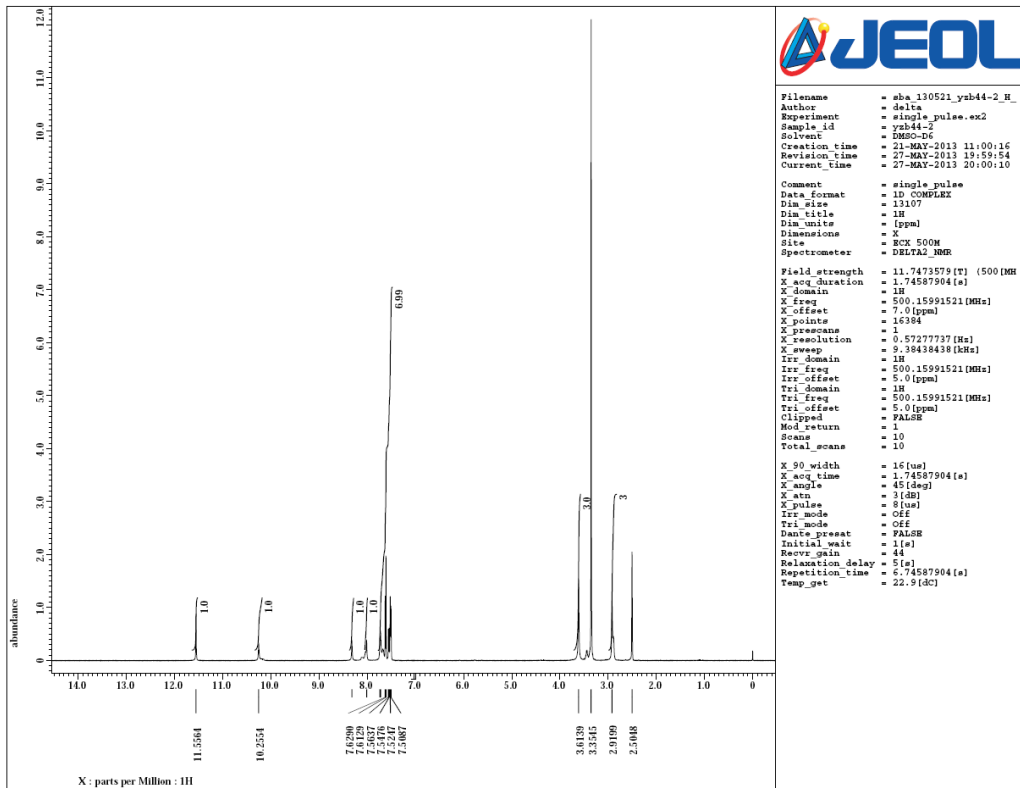

<sup>1</sup>H NMR for compound **6o**

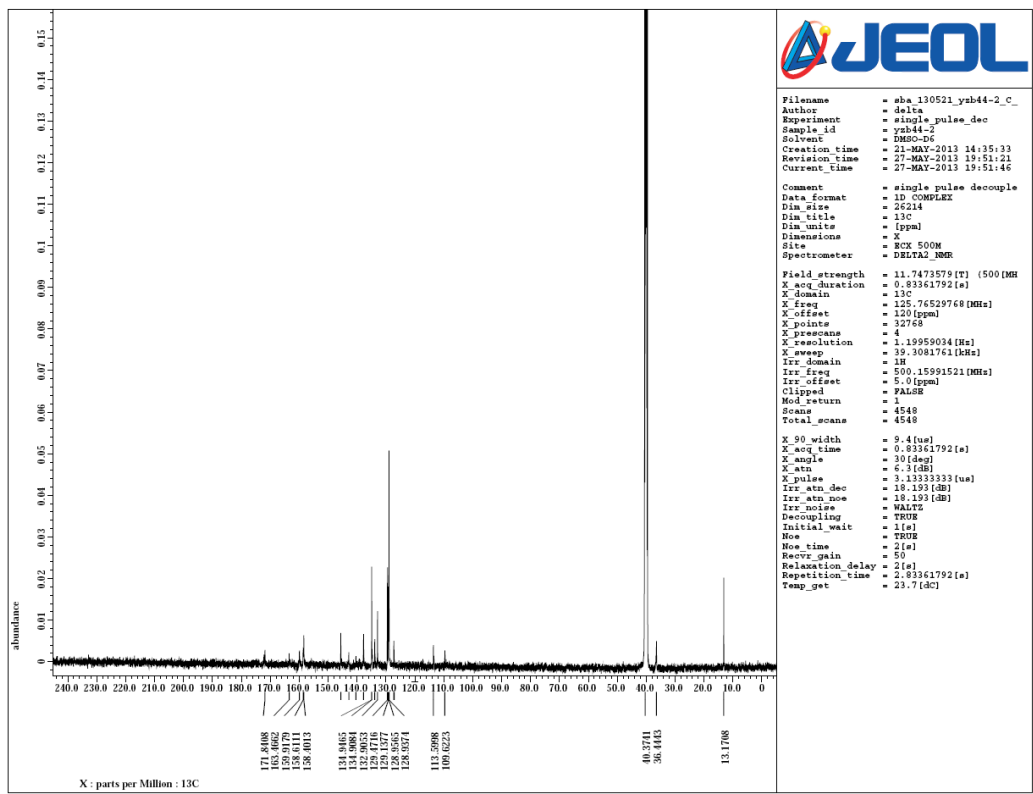

<sup>13</sup>C NMR for compound 6b

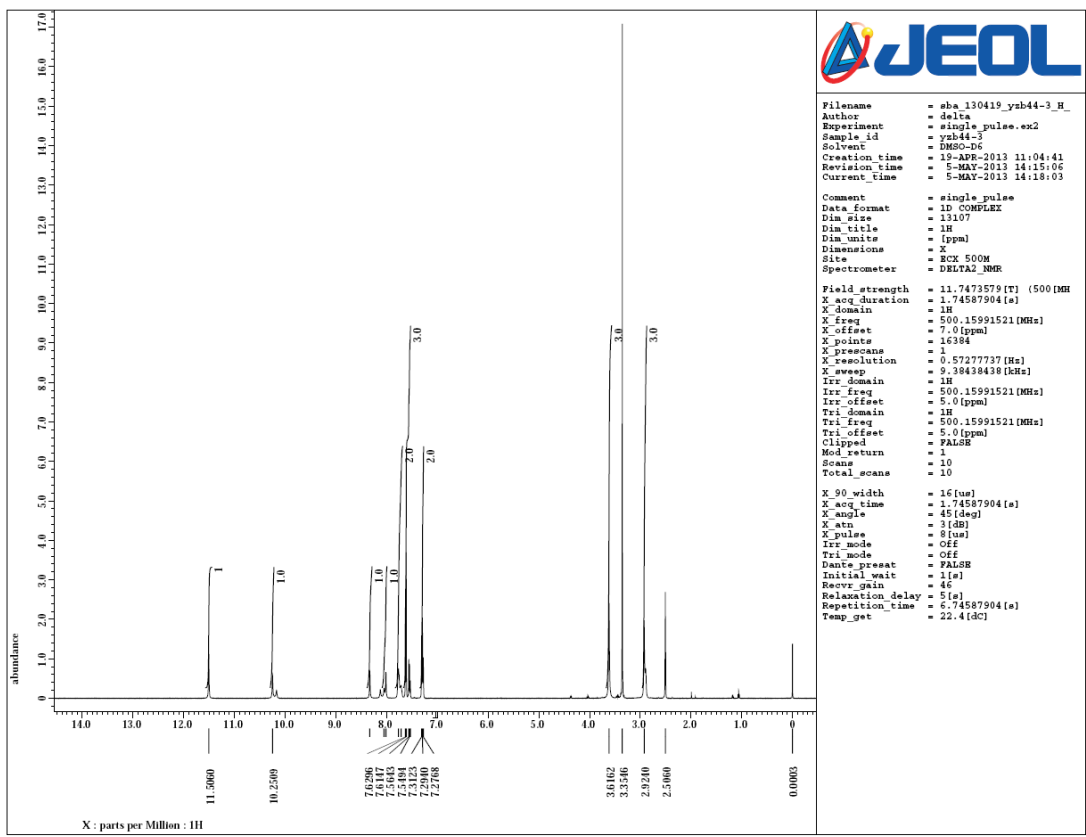

<sup>1</sup>H NMR for compound 6b





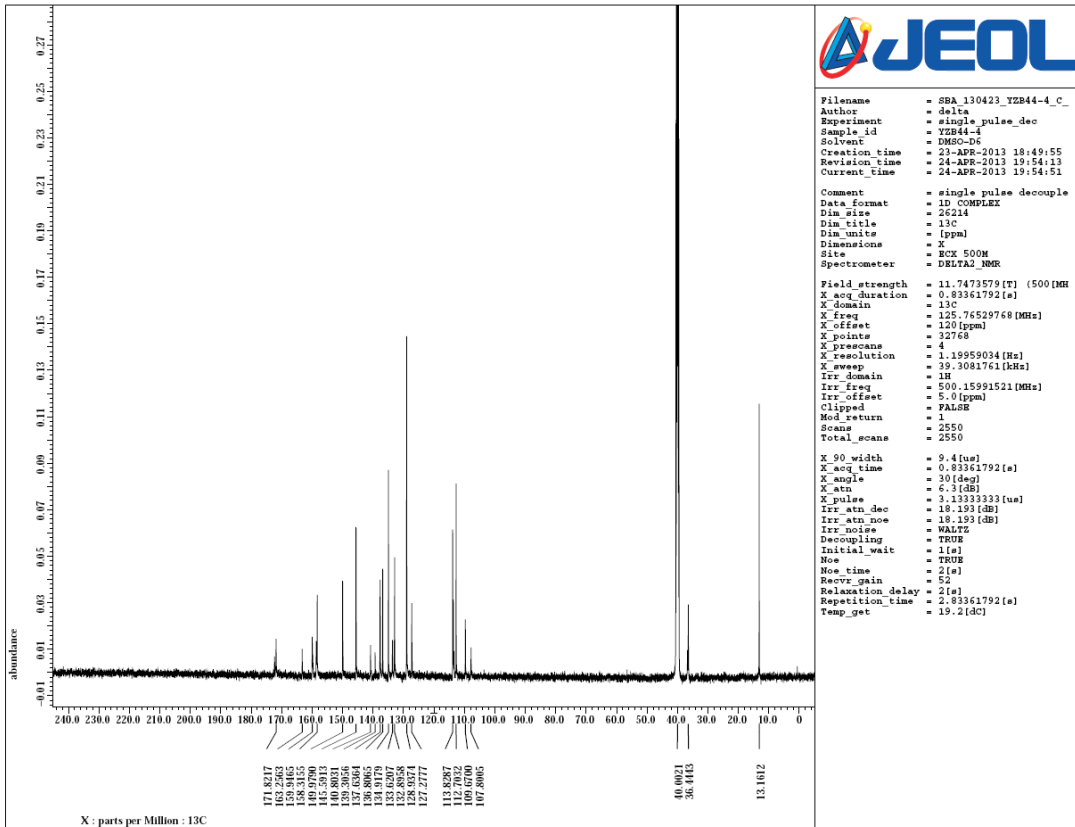

**<sup>13</sup>C NMR for compound 6q**

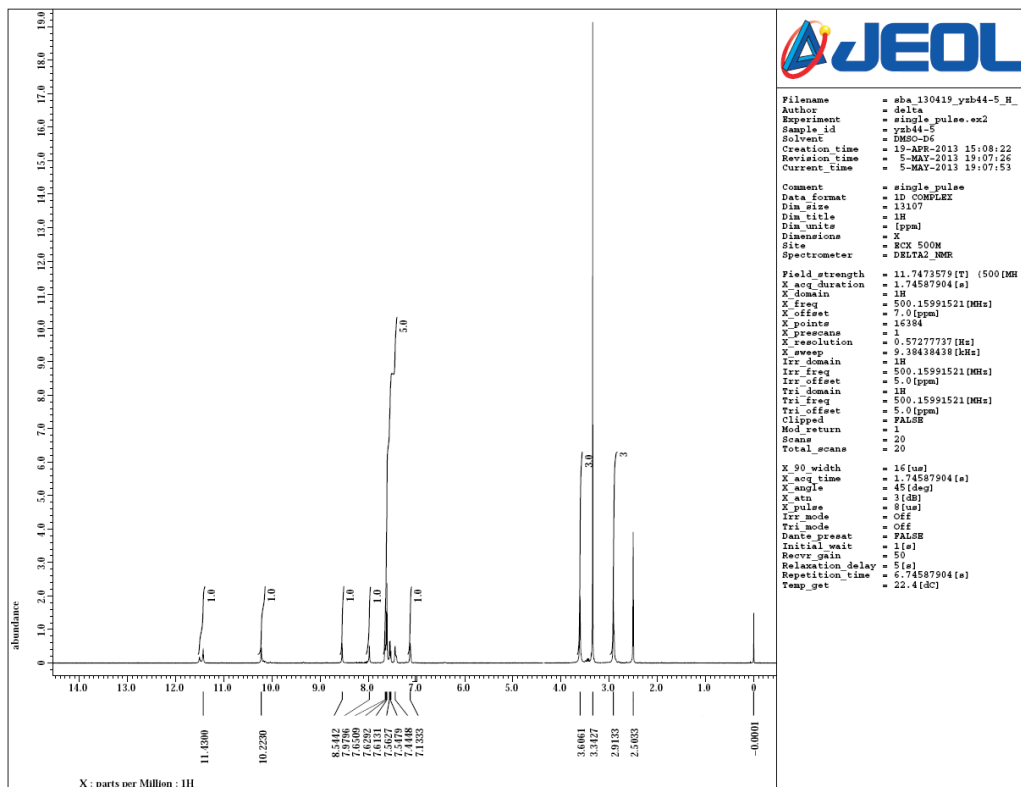

**<sup>1</sup>H NMR for compound 6r**

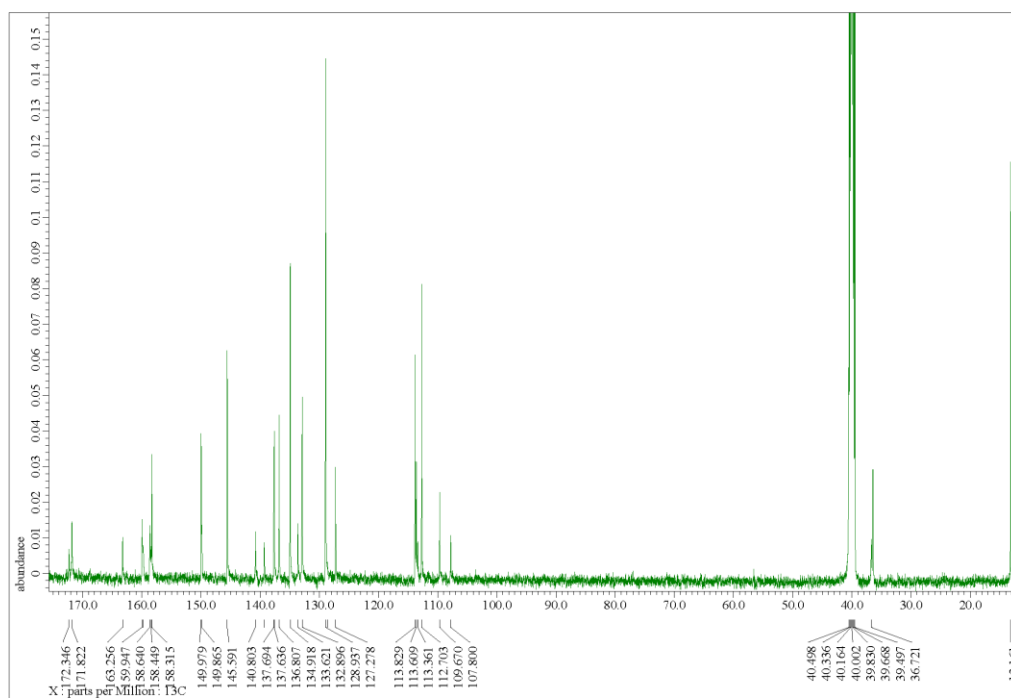

$^{13}\text{C}$  NMR for compound **6r**
